# Supplementary material
Source: PubMed Central journal article supplement (PMC3554242)
Supplement: NIHMS429989-supplement-01.pdf [file NIHMS429989-supplement-01.pdf]

## Baseline status of paediatric oncology in ten low-income or mid-income countries receiving My Child Matters support: a descriptive study

Correspondence to:  
Prof Raul Ribeiro, Department of  
Oncology and International  
Outreach Program, St Jude  
Children's Research  
Hospital, 332 North Lauderdale  
Street, Memphis, TN 38105 USA  
[raul.ribeiro@stjude.org](mailto:raul.ribeiro@stjude.org)

|                                 | Experience                                                                                                                                                                                                              | Role                                                                                                       |                                                          |
|---------------------------------|-------------------------------------------------------------------------------------------------------------------------------------------------------------------------------------------------------------------------|------------------------------------------------------------------------------------------------------------|----------------------------------------------------------|
|                                 |                                                                                                                                                                                                                         | Countries surveyed                                                                                         | Final report preparation                                 |
| Thomas Miklavc—Project Manager  | ESSEC, master in Business Administration (Harvard Business School, Boston, MA, USA), Project Leader, ESSEC Junior Council, consultant, W-MI                                                                             | Morocco                                                                                                    | All ten countries                                        |
| Julie Lyonard—Senior Consultant | Doctor of pharmacy, master of marketing and management, and Chair of Health (ESSEC International Business School, Cergy-Pontoise, France), health specialist for the French Embassy in Washington (Washington, DC, USA) | Bangladesh<br>Egypt<br>Morocco<br>Senegal<br>Philippines<br>Tanzania<br>Ukraine<br>Vietnam                 | All ten countries                                        |
| Val d'Aurelle—Advisor           | Montpellier Regional Cancer Center (Montpellier, France)                                                                                                                                                                | None                                                                                                       | All ten countries                                        |
| Adeline Jenner—Consultant       | ESCP European School of Management graduate in international affairs and project management, auditor (Ernst and Young), controller, (Strasbourg Hospital, Strasbourg, France)                                           | Bangladesh<br>Honduras<br>Morocco<br>Philippines<br>Senegal<br>Tanzania<br>Ukraine<br>Venezuela<br>Vietnam | All ten countries                                        |
| Luize Scherer Navarro—Analyst   | Master in International Development, Sciences Politiques (Paris, France), international healthcare and development consultant                                                                                           | Honduras<br>Ukraine<br>Venezuela                                                                           | Honduras<br>Ukraine<br>Venezuela                         |
| Florent Tomatis—Analyst         | Master of Public Management (ENA, Paris, France), public management specialist, analyst (Ministry of Finance, Paris, France)                                                                                            | Egypt<br>Tanzania                                                                                          | Egypt<br>Tanzania                                        |
| Grégoire Mercier—Consultant     | Intern in public health                                                                                                                                                                                                 | Morocco<br>Philippines<br>Senegal<br>Tanzania<br>Vietnam                                                   | Morocco<br>Philippines<br>Senegal<br>Tanzania<br>Vietnam |
| Jean-Luc Faillie—Consultant     | Intern in public health                                                                                                                                                                                                 | Bangladesh<br>Honduras<br>Ukraine<br>Venezuela                                                             | Bangladesh<br>Honduras<br>Ukraine<br>Venezuela           |

ESSEC=Ecole Supérieure des Sciences Economiques et Commerciales. W-MI=Wealth Management International. ESCP=Ecole Supérieur De Commerce De Paris. ENA=Ecole Nationale d'Administration.

**Webtable:** Name, education, experience, and roles of Sanisphere surveyors
